# Supplementary material for: Low-temperature-processed inorganic perovskite solar cells via solvent engineering with enhanced mass transport
Source: Royal Society of Chemistry journal article supplement (doi:10.1039/c8ta09859j), 2018-01-01
Supplement: c8ta09859j1.pdf [file c8ta09859j1.pdf]

# Low-temperature-processed inorganic perovskite solar cells via solvent engineering with enhanced mass transport

*Huachao Zai,<sup>a,b</sup> Deliang Zhang,<sup>a</sup> Liang Li,<sup>c</sup> Cheng Zhu,<sup>a</sup> Sai Ma,<sup>a</sup> Yizhou Zhao,<sup>a</sup> Zhiguo Zhao,<sup>d</sup> Changfeng Chen,<sup>b</sup> Huanping Zhou,<sup>c</sup> Yujing Li<sup>\*a</sup> and Qi Chen<sup>\*a</sup>*

- a. School of Materials Science and Engineering, Beijing Institute of Technology, Beijing 100081, P.R. China
- b. Department of Materials Science and Engineering, College of Science, China University of Petroleum, Beijing 102249, P.R. China
- c. Department of Materials Science and Engineering, College of Engineering, Peking University, Beijing 100871, P.R. China
- d. Clean Energy Research Institute, China Huaneng Group, Beijing 102209, P.R. China

## Experimental section

**Materials.** All reagents were used as received without further purification, including isopropanol (IPA, 99.99%, Sigma-Aldrich), SnO<sub>2</sub> (15% in H<sub>2</sub>O colloidal dispersion liquid, Alfa Aesar), PbI<sub>2</sub> (99.999%, Sigma-Aldrich), PbBr<sub>2</sub> (99.999%, Sigma-Aldrich), CsI (99.999%, Sigma-Aldrich), N,N-dimethylformamide (DMF, 99.99%, Sigma-Aldrich), Dimethyl sulfoxide (DMSO, 99.9%, Sigma-Aldrich), chlorobenzene (CB, 99.9%, Sigma-Aldrich), PTAA ( $\geq 99.5\%$ , Xi'an Polymer Light Technology Corp.), bis(trifluoromethane)sulfonimide lithium salt (Li-TFSI, 99.95%, Sigma-Aldrich), 4-tert-butylpyridine (tBP, 99.9%, Sigma-Aldrich), acetonitrile (ACN, 99.9%, Sigma-Aldrich) and ITO substrates.

**Fabrication of solar cells.** The indium tin oxide (ITO) coated glass was sequentially cleaned using detergent, ultra-pure water, and isopropanol. After 30 minutes of UV-O<sub>3</sub> treatments, the SnO<sub>2</sub> electron transport layers (ETLs) were spin-coated on ITO substrates from the SnO<sub>2</sub> colloidal solutions, and annealed on a hot plate at the displayed temperature of 150 °C for 30 min in ambient air. The CsPbI<sub>2</sub>Br precursor solution was prepared in a mixed solvent of DMF and DMSO with different volume ratios. The perovskite films were deposited onto the SnO<sub>2</sub> substrates with one-step spin coating procedures. The step was 3000 rpm for 30~150 s. The substrate was then immediately transferred on a hot plate and heated at 100 °C for 5 min. After cooling down to room temperature, the hole-transport layer was subsequently deposited on top of the perovskite film by spin coating at 3000 rpm for 30 s using a CB solution which contained PTAA, tBP and Li-TFSI. All operations were conducted in ambient atmosphere (temperature: 20 °C, relative humidity: 10%). Finally, 100 nm Au contact was deposited on top of Spiro-OMeTAD by thermal evaporation.

**Characterizations.** The thickness of films was measured with BRUKER DektakXT step profiler. Scanning electron microscope (SEM) images were measured using Hitachi S4800 field-emission scanning electron microscopy. X-ray diffraction (XRD) patterns were recorded by Rigaku D/Max 2,200 with Cu K $\alpha$  as the X-ray source. The UV-visible absorption spectra were measured by Hitachi UH4150 spectrophotometer. PL spectra and TRPL spectra were obtained by FLS980 (Edinburgh Instruments Ltd) with an excitation at 510 nm. The J-V measurement was performed via the solar simulator (SS-F5-3A, Enlitech) along with AM 1.5G spectra whose intensity was calibrated by the certified standard silicon solar cell (SRC-2020, Enlitech) at 100mW/cm<sup>2</sup>. Light intensity was calibrated with a National Institute of Metrology (China) calibrated KG5-filtered Si reference cell. The scanning speed of all J-V curves is 0.1 V/s. The effective area of cells were 0.1003 cm<sup>2</sup> and 1.0 cm<sup>2</sup> defined by masks for all the photovoltaic devices discussed in this work. The external quantum efficiency (EQE) data were obtained by using the solar-cell spectral-response measurement system (QE-R, Enlitech). A calibrated silicon diode with a known spectral response was used as a reference. The absorption and transmission spectra were measured by Hitachi UH4150 spectrophotometer.

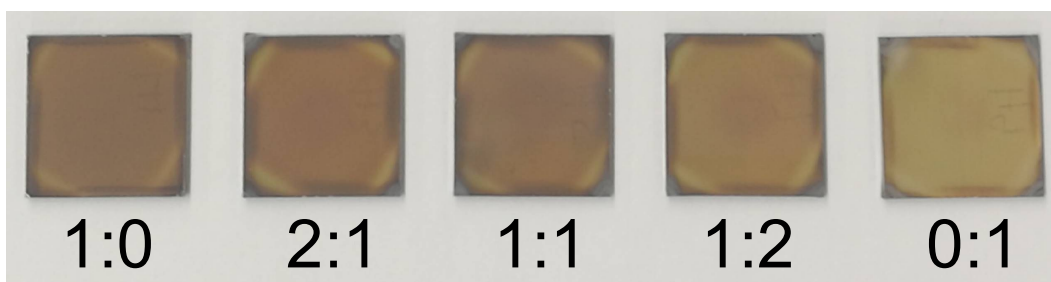

**Figure S1.** Optical image of perovskite films fabricated with different DMF: DMSO ratios (0.4 M).

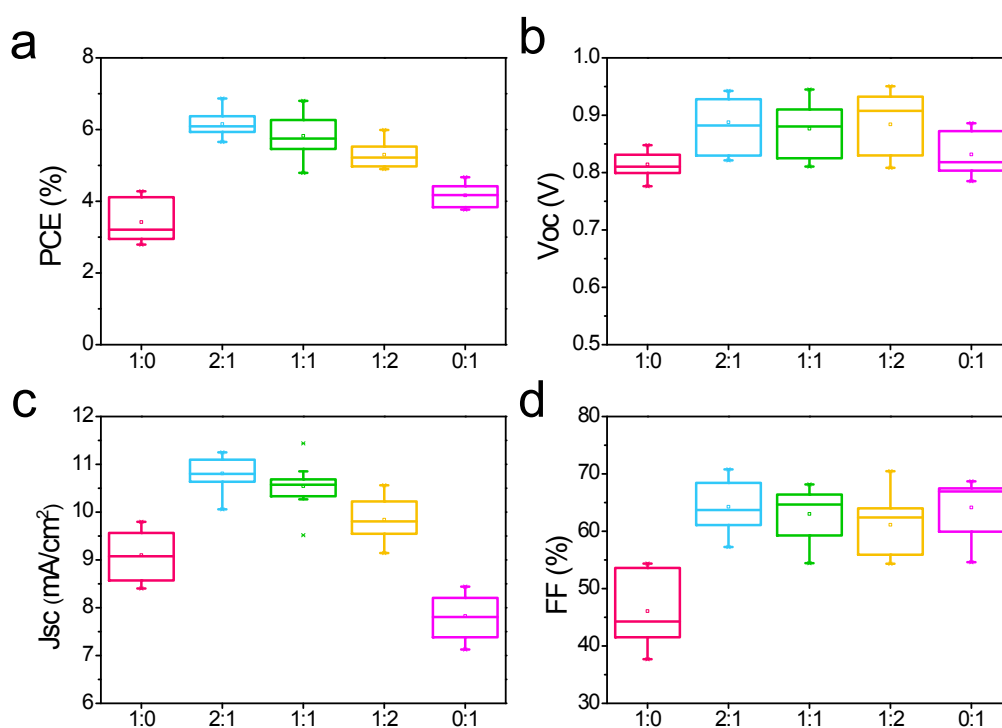

**Figure S2.** PV metrics for devices (~20 cells for each condition) fabricated with different DMF: DMSO ratios (0.4 M).

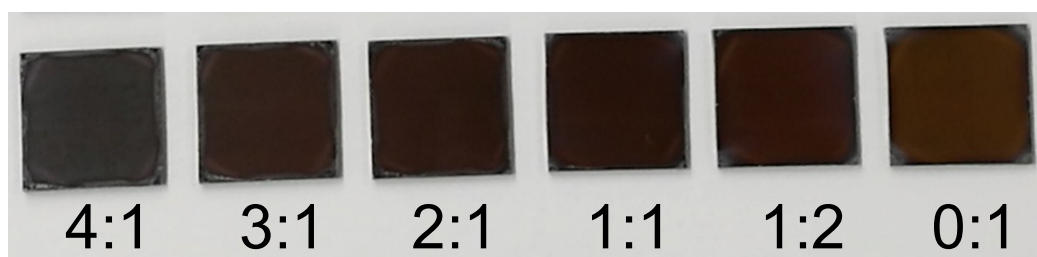

**Figure S3.** Optical image of perovskite films fabricated with different DMF: DMSO ratios (0.8 M).

**Table S1.** Thicknesses of the CsPbI<sub>2</sub>Br films fabricated with different DMF: DMSO ratios (0.8 M).

| Samples | Thicknesses of the CsPbI <sub>2</sub> Br films (nm) |        |        |        |        | Average (nm) |
|---------|-----------------------------------------------------|--------|--------|--------|--------|--------------|
| 4:1     | 303.63                                              | 303.86 | 308.10 | 304.80 | 306.70 | 305.418      |
| 3:1     | 302.76                                              | 296.08 | 309.85 | 308.20 | 307.20 | 304.818      |
| 2:1     | 303.17                                              | 296.38 | 306.03 | 289.61 | 308.40 | 300.718      |
| 1:1     | 266.99                                              | 297.28 | 291.61 | 303.69 | 285.74 | 289.062      |
| 1:2     | 231.81                                              | 285.27 | 276.68 | 278.12 | 287.57 | 271.890      |
| 0:1     | 224.84                                              | 209.10 | 223.42 | 223.18 | 213.42 | 218.792      |

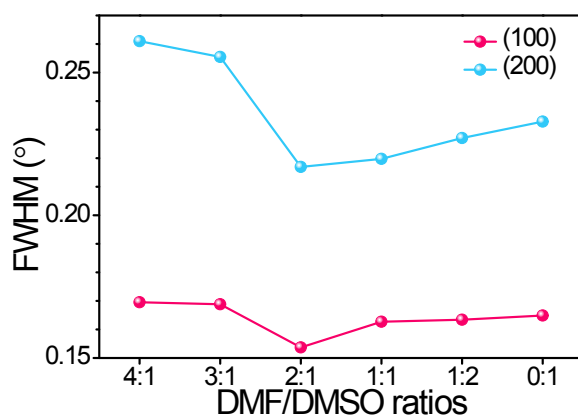

**Figure S4.** FWHM of (100) and (200) peaks for perovskite films fabricated with different DMF: DMSO ratios.

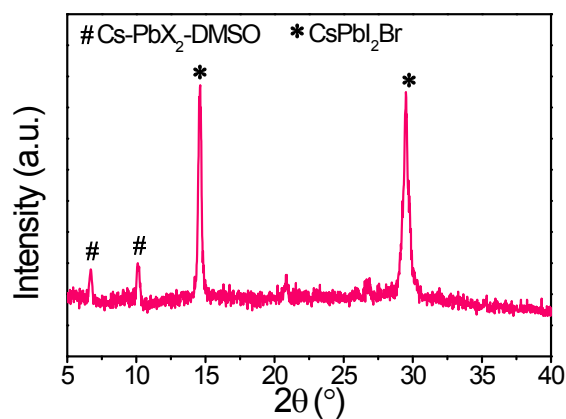

**Figure S5.** XRD pattern of the as spin-coated film fabricated with DMF/DMSO=2/1 before annealing.

**Table S2.** Carrier lifetimes for the CsPbI<sub>2</sub>Br films fabricated with different DMF: DMSO ratios.

| Sample | $\tau_1$ (ns) | $\tau_2$ (ns) | $A_1$ | $A_2$ | $\tau_{ave}$ (ns) |
|--------|---------------|---------------|-------|-------|-------------------|
| 4:1    | 4.58          | 10.51         | 0.93  | 0.07  | 4.98              |
| 3:1    | 5.15          | 11.37         | 0.90  | 0.10  | 5.74              |
| 2:1    | 6.63          | 12.10         | 0.86  | 0.14  | 7.40              |
| 1:1    | 5.85          | 11.45         | 0.87  | 0.13  | 6.58              |
| 1:2    | 3.20          | 6.37          | 0.81  | 0.19  | 3.82              |
| 0:1    | 2.38          | 4.79          | 0.52  | 0.48  | 3.53              |

**Table S3.** Urbach energies for the CsPbI<sub>2</sub>Br films fabricated with different DMF: DMSO ratios.

| Sample      | 4:1    | 3:1   | 2:1   | 1:1   | 1:2    | 0:1    |
|-------------|--------|-------|-------|-------|--------|--------|
| $E_u$ (meV) | 148.87 | 92.96 | 80.89 | 85.52 | 154.08 | 157.47 |

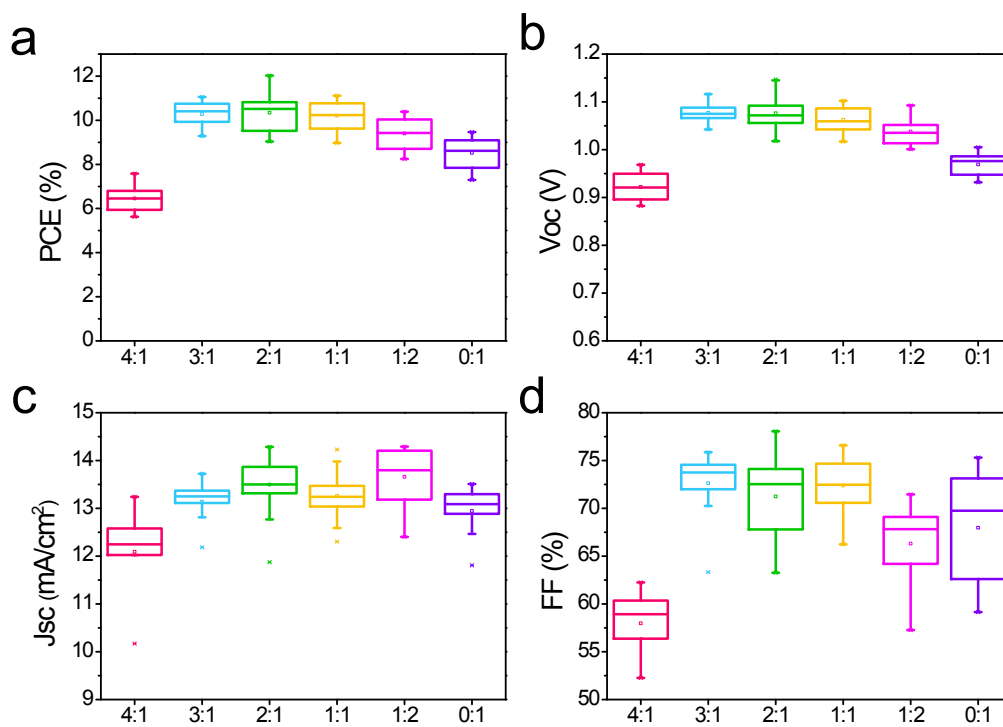

**Figure S6.** PV metrics for devices (~20 cells for each condition) fabricated with different DMF:DMSO ratios (0.8 M).

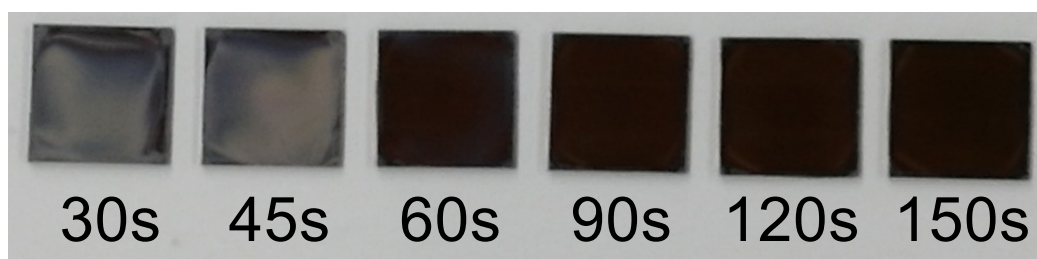

**Figure S7.** Optical image of perovskite films fabricated with different spin-coating time.

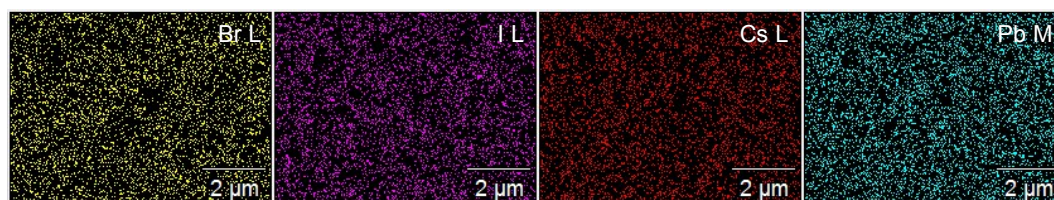

**Figure S8.** EDX mapping images for a perovskite film fabricated with 120 s.

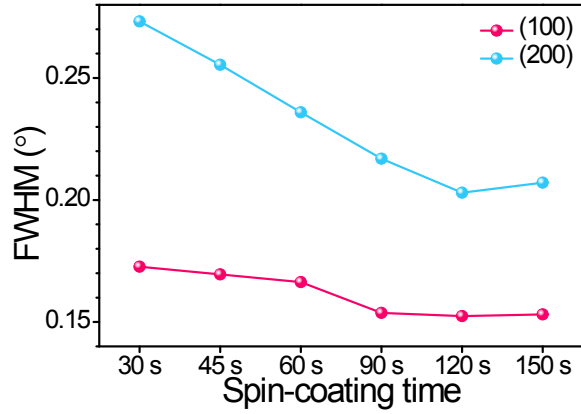

**Figure S9.** FWHM of (100) and (200) peaks for perovskite films fabricated with different spin-coating time.

**Table S4.** Thicknesses of the CsPbI<sub>2</sub>Br films fabricated with different spin-coating time.

| Samples | Thicknesses of the CsPbI <sub>2</sub> Br films (nm) |        |        |        |        | Average (nm) |
|---------|-----------------------------------------------------|--------|--------|--------|--------|--------------|
|         | 1                                                   | 2      | 3      | 4      | 5      |              |
| 30 s    | 289.76                                              | 301.53 | 308.47 | 309.46 | 291.53 | 300.150      |
| 45 s    | 296.80                                              | 297.53 | 309.82 | 291.57 | 308.58 | 300.860      |
| 60 s    | 301.52                                              | 300.56 | 307.53 | 290.26 | 306.26 | 301.226      |
| 90 s    | 303.17                                              | 296.38 | 306.03 | 289.61 | 308.40 | 300.718      |
| 120 s   | 304.56                                              | 297.52 | 304.53 | 293.47 | 308.40 | 301.696      |
| 150 s   | 297.19                                              | 303.55 | 297.68 | 305.43 | 304.30 | 301.630      |

**Table S5.** Carrier lifetimes for the CsPbI<sub>2</sub>Br films fabricated with different spin-coating time.

| Sample | $\tau_1$ (ns) | $\tau_2$ (ns) | A <sub>1</sub> | A <sub>2</sub> | $\tau_{ave}$ (ns) |
|--------|---------------|---------------|----------------|----------------|-------------------|
| 30 s   | 2.47          | 13.38         | 0.99           | 0.01           | 2.61              |
| 45 s   | 2.83          | 5.71          | 0.89           | 0.11           | 3.15              |
| 60 s   | 3.92          | 6.81          | 0.67           | 0.33           | 4.86              |
| 90 s   | 6.63          | 12.10         | 0.86           | 0.14           | 7.40              |
| 120 s  | 6.79          | 14.17         | 0.65           | 0.35           | 9.41              |

|       |      |       |      |      |      |
|-------|------|-------|------|------|------|
| 150 s | 6.84 | 12.83 | 0.68 | 0.32 | 8.76 |
|-------|------|-------|------|------|------|

**Table S6.** Urbach energies for the CsPbI<sub>2</sub>Br films fabricated with different spin-coating time.

| Sample               | 30 s   | 45 s   | 60 s   | 90 s  | 120 s | 150 s |
|----------------------|--------|--------|--------|-------|-------|-------|
| E <sub>u</sub> (meV) | 161.99 | 160.34 | 112.28 | 80.89 | 61.55 | 73.28 |

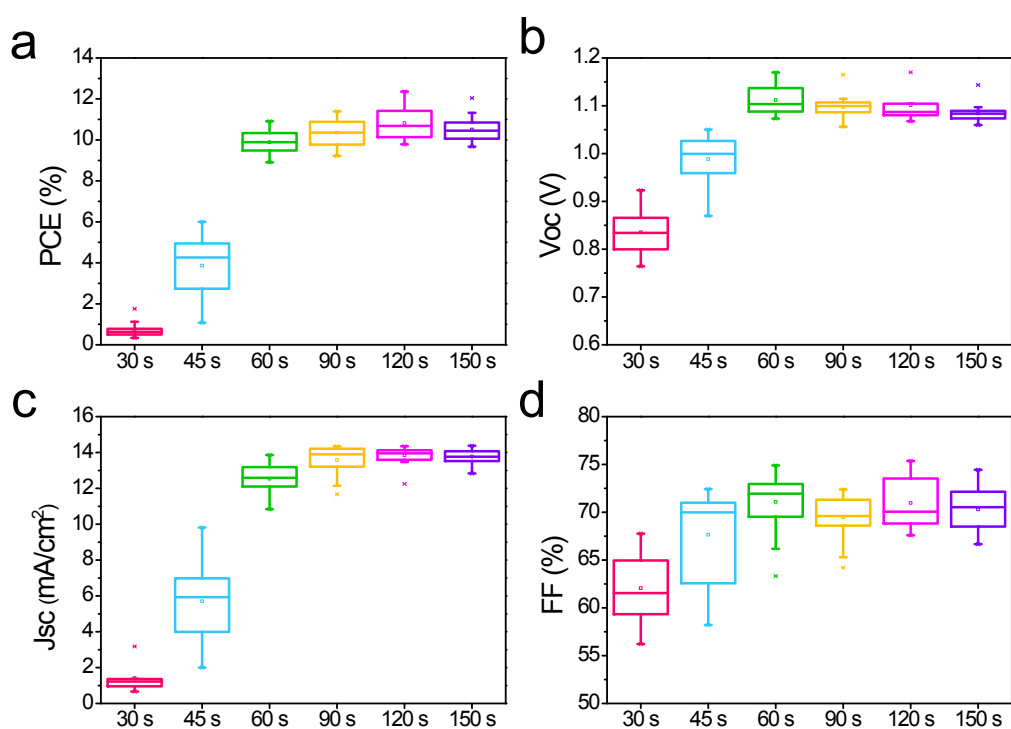

**Figure S10.** PV metrics for devices (~20 cells for each condition) fabricated with different different spin-coating time.



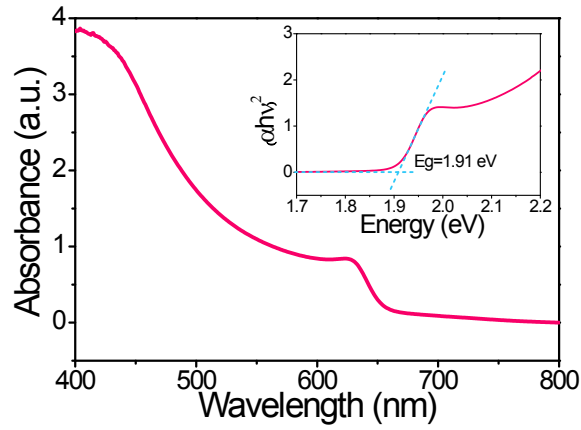

**Figure S11.** UV-vis absorption spectrum of the perovskite film fabricated with optimal condition, with an inset showing the Tauc plot.

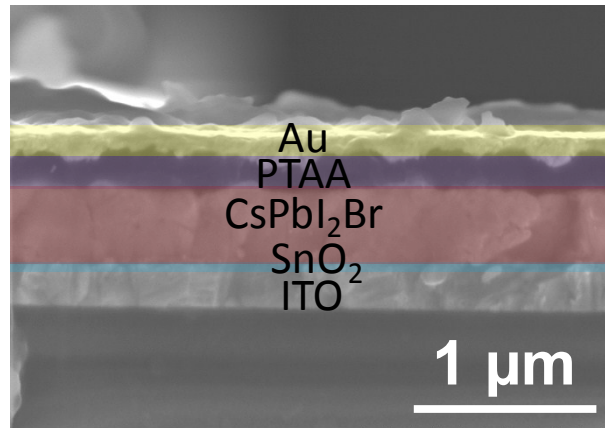

**Figure S12.** Cross-sectional SEM image of the optimal device.

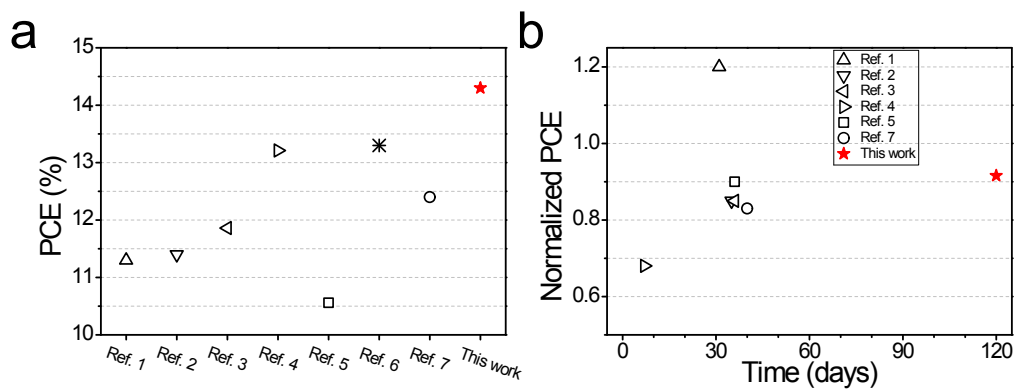

**Figure S13.** Comparison of (a) PCE and (b) long-term stability for inorganic perovskite solar cells with PCE over 10% via low-temperature process.<sup>1-7</sup>

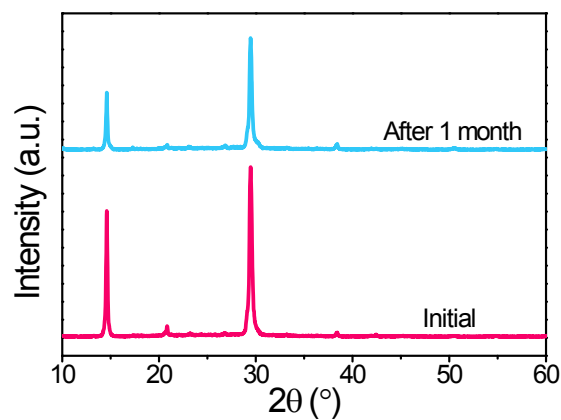

**Figure S14.** XRD patterns evolution of the CsPbI<sub>2</sub>Br film heated on a 100 °C hotplate in a nitrogen filled glove box.

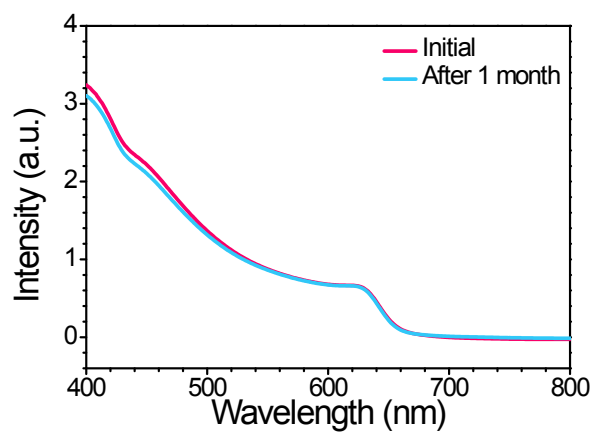

**Figure S15.** UV-vis spectra evolution of the CsPbI<sub>2</sub>Br film heated on a 100 °C hotplate in a nitrogen filled glove box.

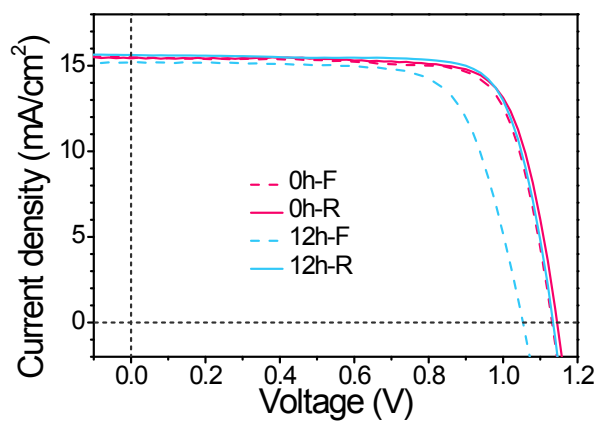

**Figure S16.** J-V curves for a device measured by forward and reverse scans with a 0.1 cm<sup>2</sup> active area before and after 12 h under continuous light soaking.

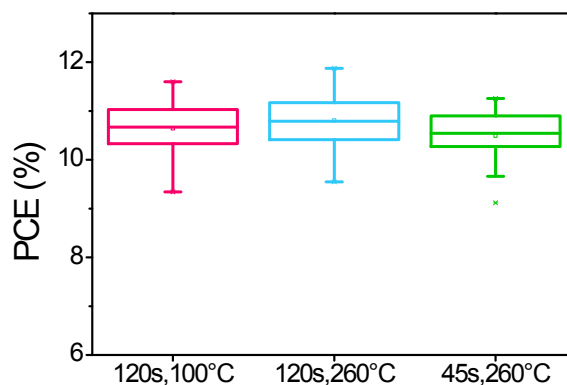

**Figure S17.** PCE for devices (~20 cells for each condition) fabricated with different spin-coating time and annealing temperature. (0.8 M)

References:

1. C. F. J. Lau, M. Zhang, X. Deng, J. Zheng, J. Bing, Q. Ma, J. Kim, L. Hu, M. A. Green, S. Huang and A. Ho-Baillie, *ACS Energy Lett.*, 2017, **2**, 2319-2325.
2. Q. Wang, X. Zheng, Y. Deng, J. Zhao, Z. Chen and J. Huang, *Joule*, 2017, **1**, 371-382.
3. T. Zhang, M. I. Dar, G. Li, F. Xu, N. Guo, M. Grätzel and Y. Zhao, *Science Advances*, 2017, **3**, e1700841.
4. Y. Hu, F. Bai, X. Liu, Q. Ji, X. Miao, T. Qiu and S. Zhang, *ACS Energy Lett.*, 2017, **2**, 2219-2227.
5. Y. Wang, T. Zhang, F. Xu, Y. Li and Y. Zhao, *Solar RRL*, 2018, **2**, 1700180.
6. C. Liu, W. Li, C. Zhang, Y. Ma, J. Fan and Y. Mai, *J. Am. Chem. Soc.*, 2018, **140**, 3825-3828.
7. Y. Jiang, J. Yuan, Y. Ni, J. Yang, Y. Wang, T. Jiu, M. Yuan and J. Chen, *Joule*, 2018, **2**, 1356-1368.
